# Supplementary material for: Value-added methanol electroreforming coupled with green hydrogen production at the edge interface of 2D boron nanosheets
Source: Royal Society of Chemistry journal article supplement (doi:10.1039/d3ta03513a), 2023-01-01
Supplement: d3ta03513a1.pdf [file d3ta03513a1.pdf]

*Electronic supporting information for*

**Value-added methanol electroreforming coupled with green hydrogen  
production at the edge interface of 2D boron nanosheets**

*Arunprasath Sathyaseelan<sup>1</sup>, Karthikeyan Krishnamoorthy<sup>1,2,3</sup>, Parthiban Pazhamalai<sup>1,2</sup>,*

*Noor Ul Haq Liyakath Ali<sup>1</sup> and Sang-Jae Kim<sup>1,2,4\*</sup>*

<sup>1</sup>Nanomaterials & System Laboratory, Major of Mechatronics Engineering, Faculty of Applied Energy System, Jeju National University, Jeju, 63243, South Korea

<sup>2</sup>Research Institute of New Energy Industry (RINEI), Jeju National University, Jeju, 63243, South Korea

<sup>3</sup>Department of Physics, School of Advanced Sciences, Vellore Institute of Technology, Vellore, 632014, India

<sup>4</sup>Nanomaterials & System Lab, Major of Mechanical System Engineering, College of Engineering, Jeju National University, Jeju, 63243, South Korea

\*Corresponding author Email: [kimsangi@jejunu.ac.kr](mailto:kimsangi@jejunu.ac.kr)

## 1. Experimental Section:

The faradaic efficiency of the hybrid water electrolyser device was calculated by water drainage method using lab made H-type membrane water electrolyser device.

The amount of hydrogen gas (H<sub>2</sub>) evolved during the electrolysis process was collected through measuring cylinder by applying a constant current density with various time interval. The amount of hydrogen released as theoretical were calculated using following faraday's law.

$$V_{Theo} = IRTt / PzF \dots\dots\dots(1)$$

V<sub>Theo</sub> = Theoretical volume of evolved gas

I= working current density (mA cm<sup>-2</sup>)

T is working temperature (K) and 't' is time interval (s)

R is the gas constant and 'P' is the working pressure

F is the Faraday's constant (F=96485 C)

z is the number of electrons for generating 1 mol H<sub>2</sub> (z=2)

Faradaic efficiency (η<sub>F</sub>) was determined by ratio of measured gas volume (V<sub>meas</sub>) and theoretically calculated volumes (V<sub>Theo</sub>) as given in equation

$$\eta_F = V_{meas} / V_{Theo} \dots\dots\dots(2)$$

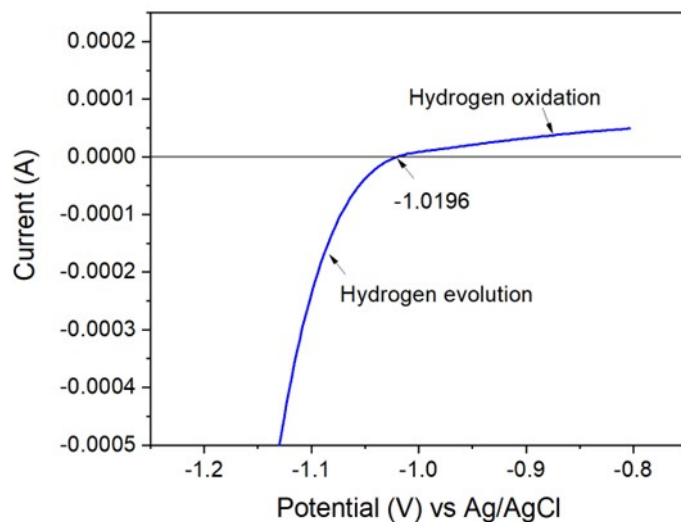

**Figure S1:** Calibration of Ag/AgCl in H<sub>2</sub> saturated 1.0 M KOH electrolyte.

The calibration of Ag/AgCl reference electrode was done in a H<sub>2</sub> saturated 1.0 M KOH electrolyte at a scan rate of 1 mV/s. From the LSV, the current which crosses zero was identifies as a thermodynamic potential of hydrogen electrode and the potential was found to be 1.0196 V. In 1 M KOH,  $E_{RHE} = E_{Ag/AgCl} + 1.0196 \text{ V}$ .<sup>1-3</sup>

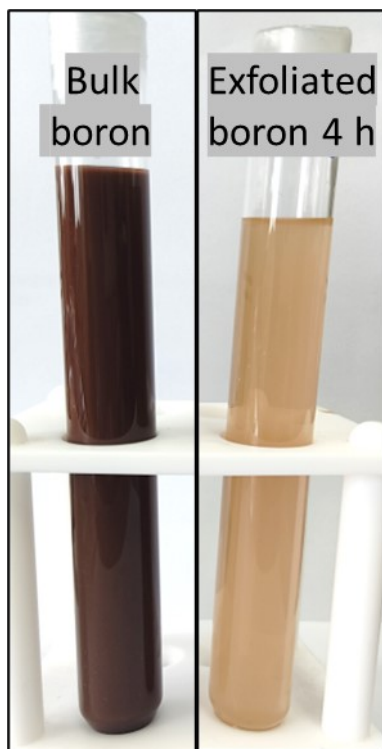

**Figure S2:** Digital photograph of bulk boron and exfoliated boron nanosheets 4 h.

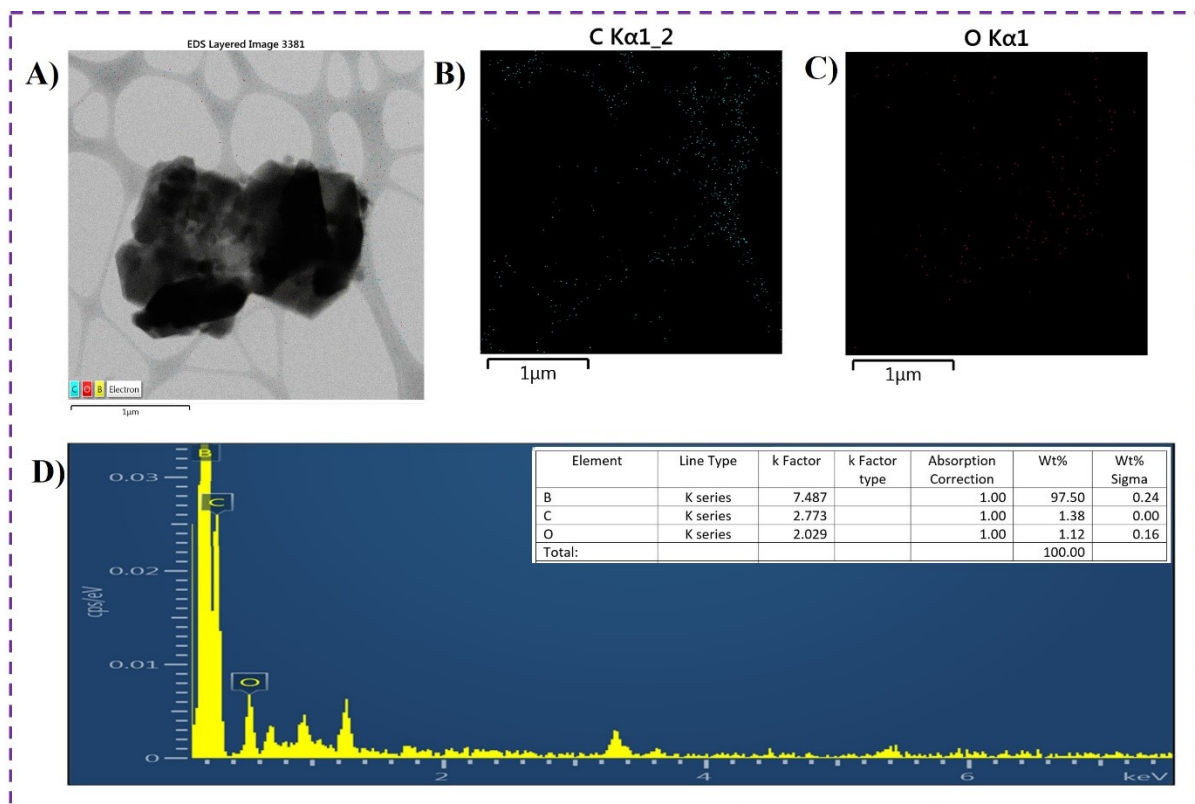

**Figure S3:** HR-TEM images of bulk boron. (A) Overlay mapping, (B-D) elemental mapping analysis of C and O. (E) Corresponding EDS spectrum.

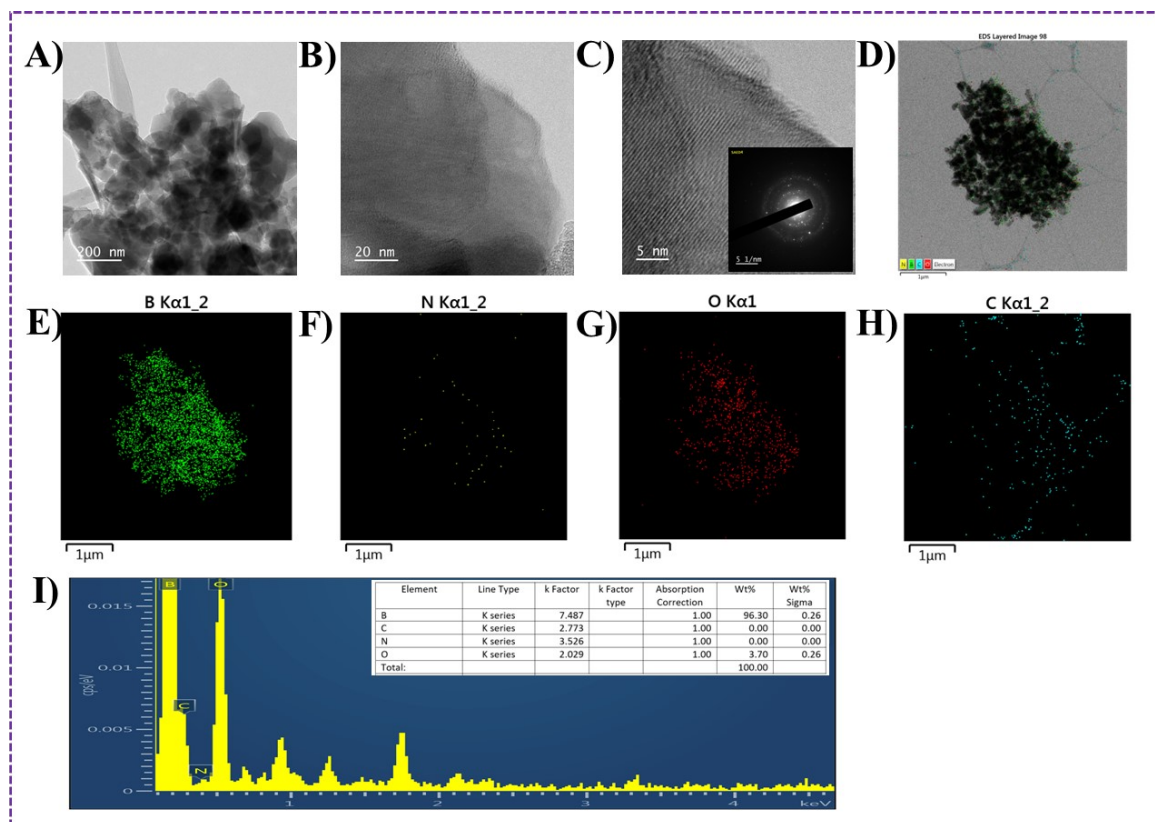

**Figure S4.** Morphological analysis of eBNS-2. (A-C) HR-TEM images of eBNS-2 at different magnifications and inset in (C) present the corresponding SAED pattern. (D) EDS overlay mapping and (E-H) individual elemental mapping of B, N, O, C. (I) EDS spectrum of eBNS-2.

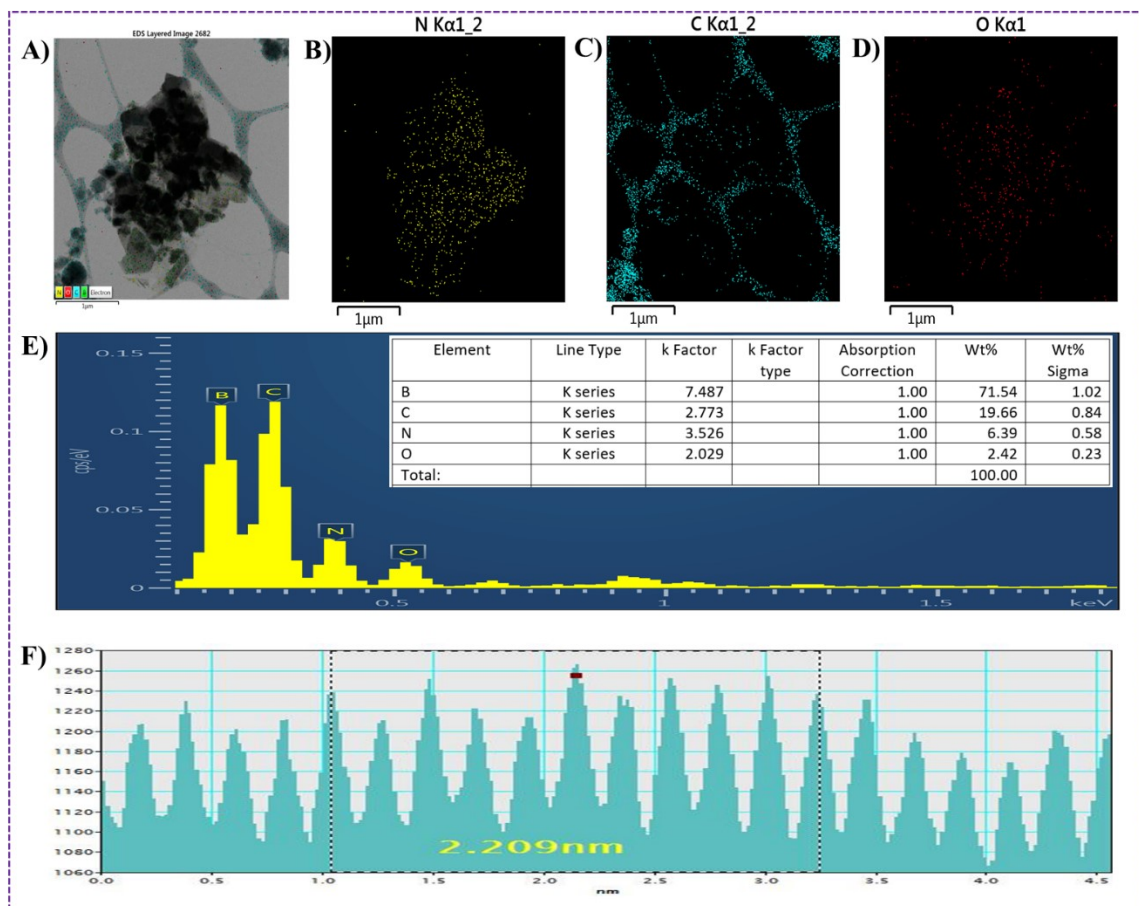

**Figure S5:** HR-TEM images of exfoliated boron nanosheets. (A) Overlay mapping, (B-D) elemental mapping analysis of N, C and O. (E) Corresponding EDS spectrum. (F) average d-spacing distribution profile of eBNS-4.

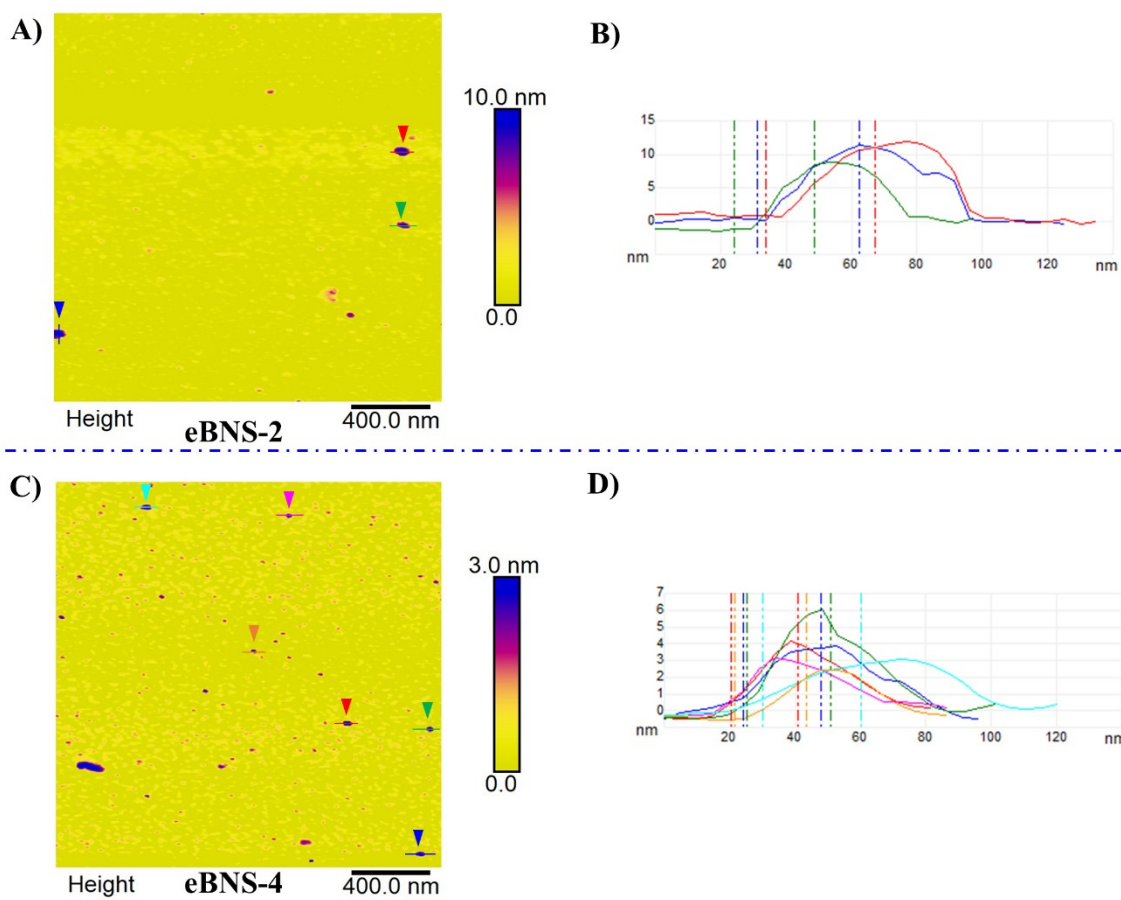

**Figure S6.** (A-D) AFM analysis of eBNS-2 and eBNS-4 with section analysis at different places.



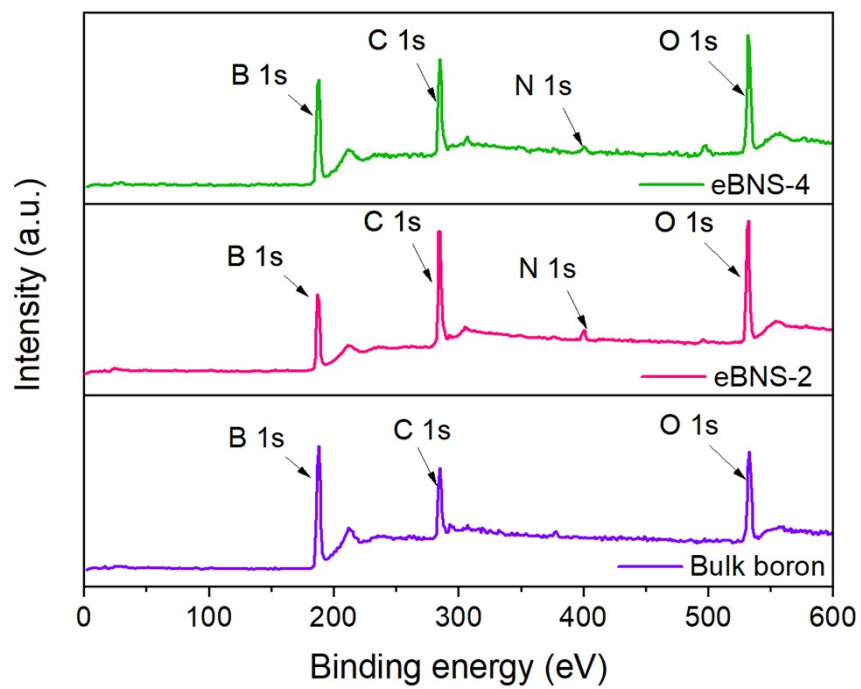

**Figure S7.** X-ray photoelectron survey spectra of eBNS-4 eBNS-2 and BB.

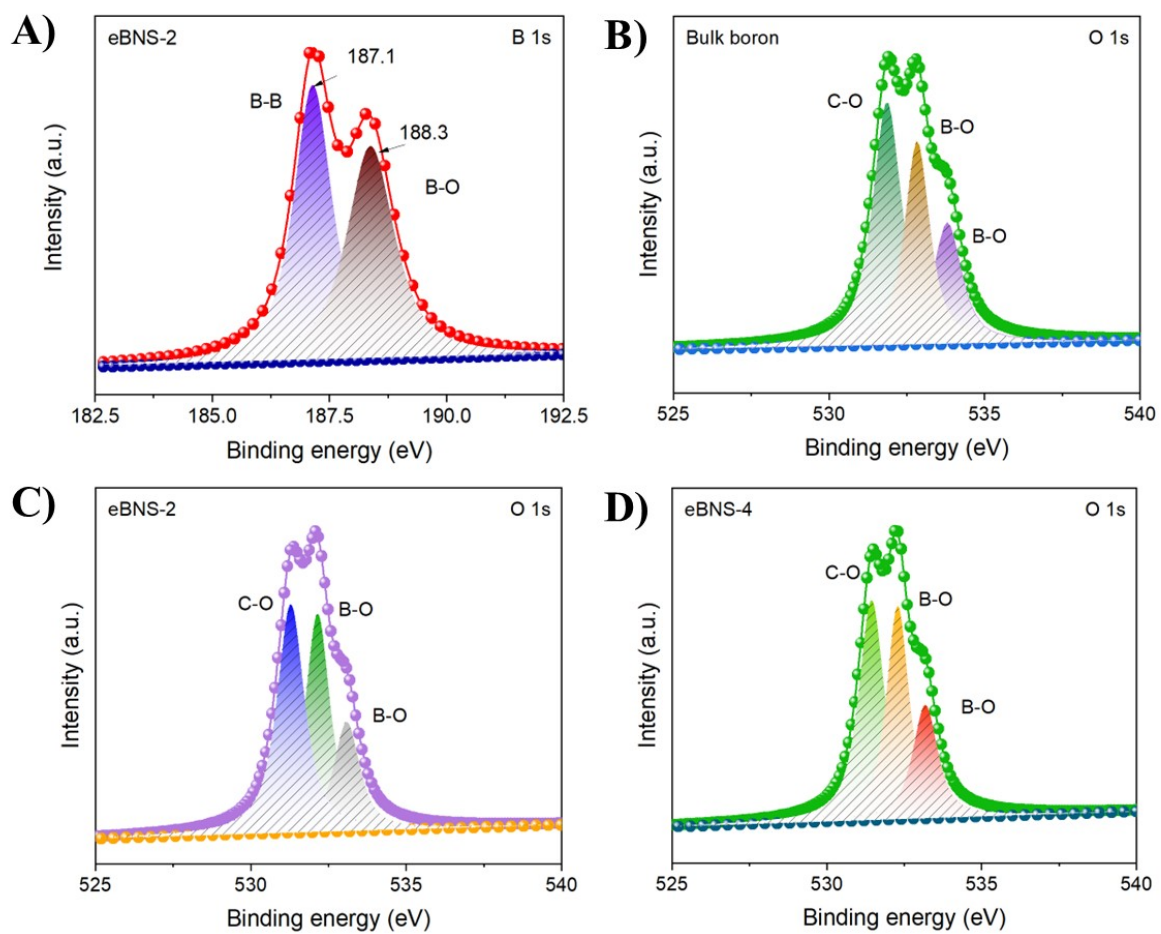

**Figure S8.** (A) Deconvoluted B1s spectrum of eBNS-2, (B-D) O 1s core-level spectrum presented in the bulk boron, eBNS-2, and eBNS-4.

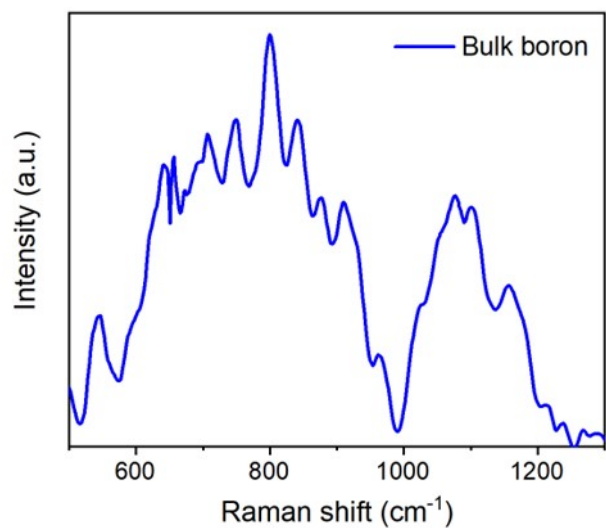

**Figure S9.** Laser Raman spectra of bulk boron.

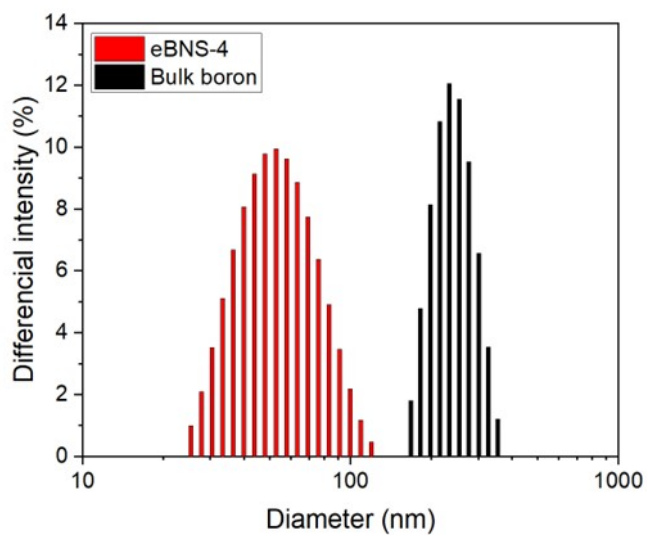

**Figure S10.** Particle size distribution analysis of eBNS-4 and BB.

**Mechanism of hydrogen evolution reaction and oxygen evolution reaction occurring at the surface the few layered boron and bulk boron electrodes in the alkaline medium are given below:**

Mechanism of hydrogen evolution reaction occurring at the surface of prepared catalysts are given below.

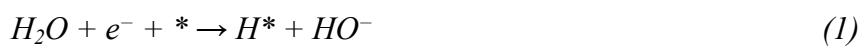

*Volmer (120 mV dec<sup>-1</sup>)*

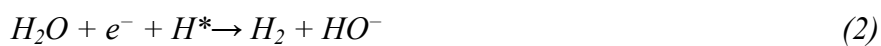

*Heyrovsky (40 mV dec<sup>-1</sup>)*

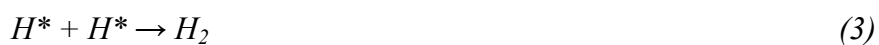

*Tafel (30 mV dec<sup>-1</sup>)*

Mechanism of oxygen evolution reaction occurring at the surface prepared catalysts are given below.

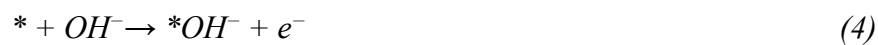

*(Tafel slope: 120 mV dec<sup>-1</sup>)*

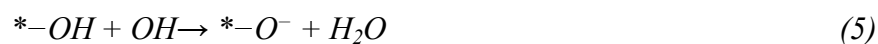

*(Tafel slope: 60 mV dec<sup>-1</sup>)*

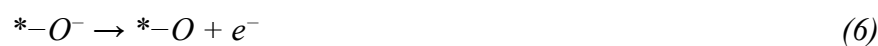

*(Tafel slope: 40 mV dec<sup>-1</sup>)*

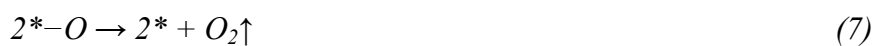

*(Tafel slope: 15 mV dec<sup>-1</sup>)*

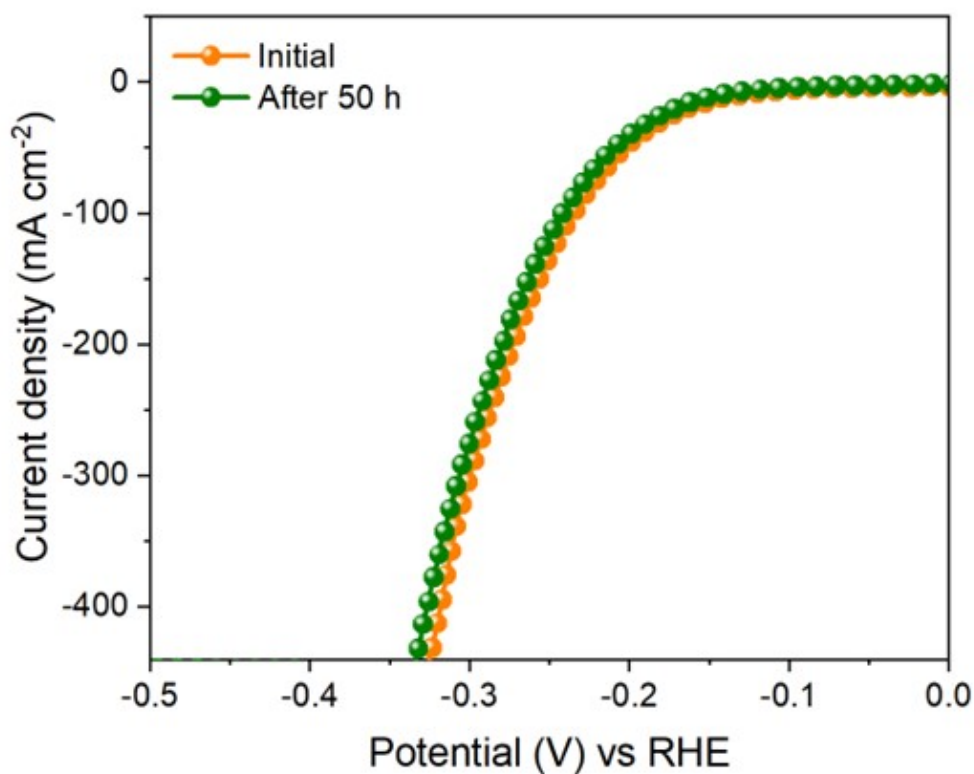

**Figure S11.** HER LSV polarization before and after the stability test.

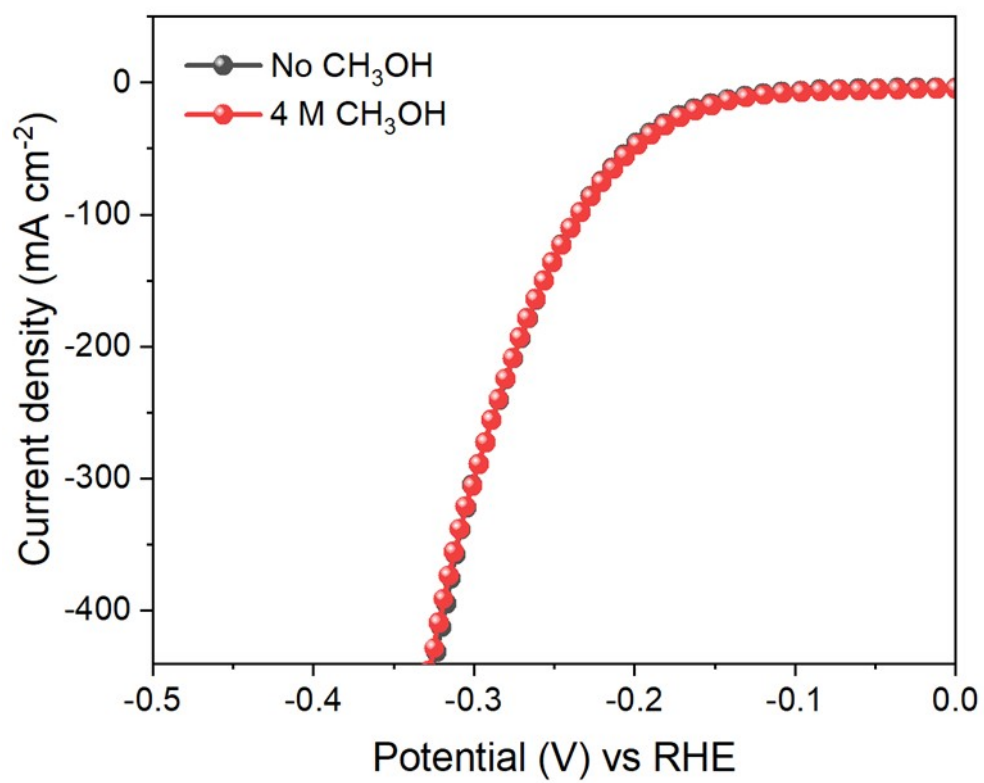

**Figure S12.** HER LSV polarization of eBNS/NF-4 measured in 1.0 M KOH with 4 M CH<sub>3</sub>OH.

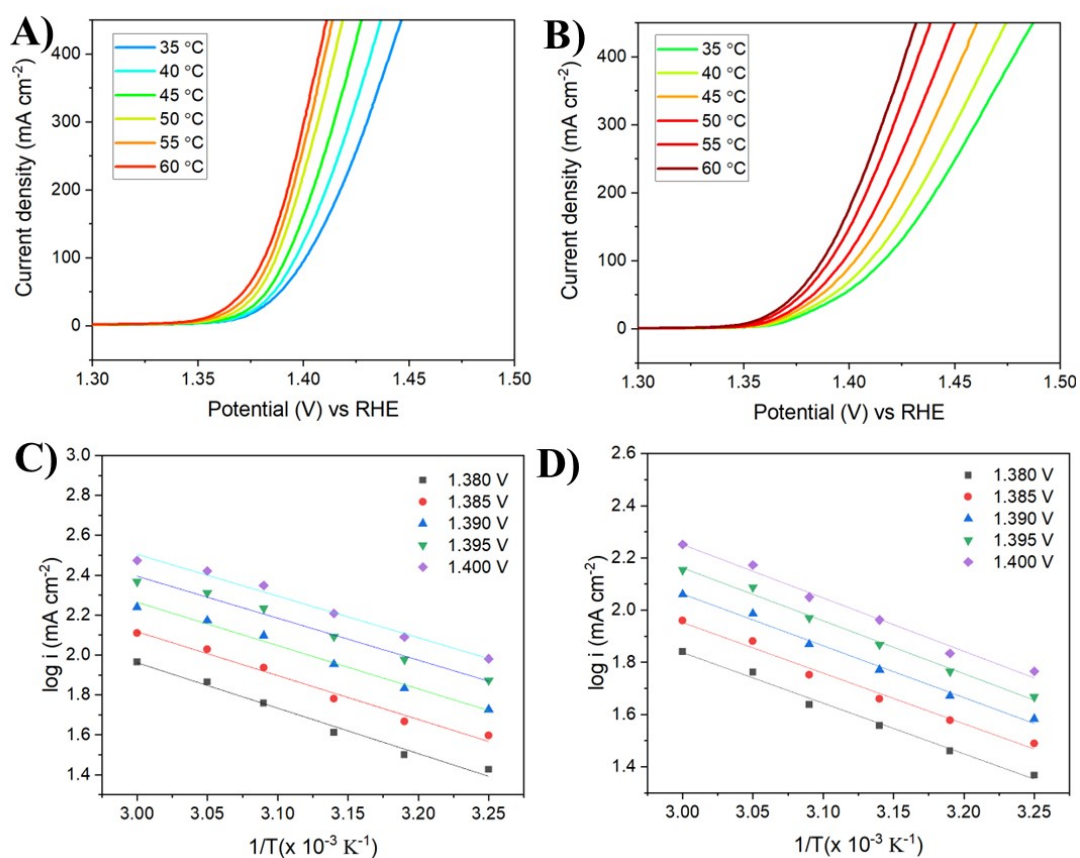

**Figure S13.** Temperature dependent MOR analysis of (A) eBNS/NF-4 and (B) BB/NF.

Arrhenius plot of MOR logarithmic current densities at various measured potentials for (C)

eBNS/NF-4 and (D) BB/NF.

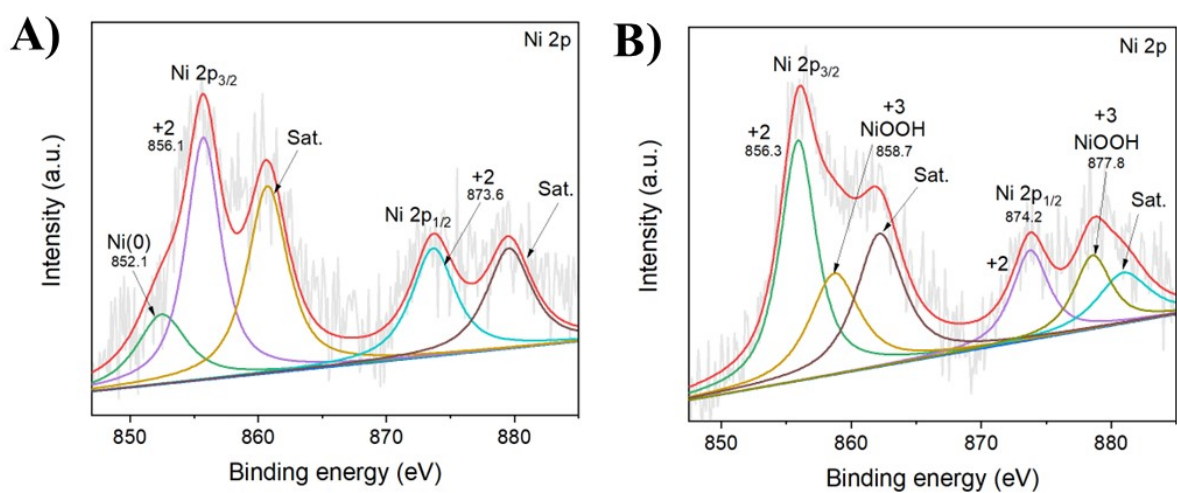

**Figure S14.** Deconvoluted XPS Ni 2p core level spectrum of eBNS/NF-4 before (A) and after stability test (B)



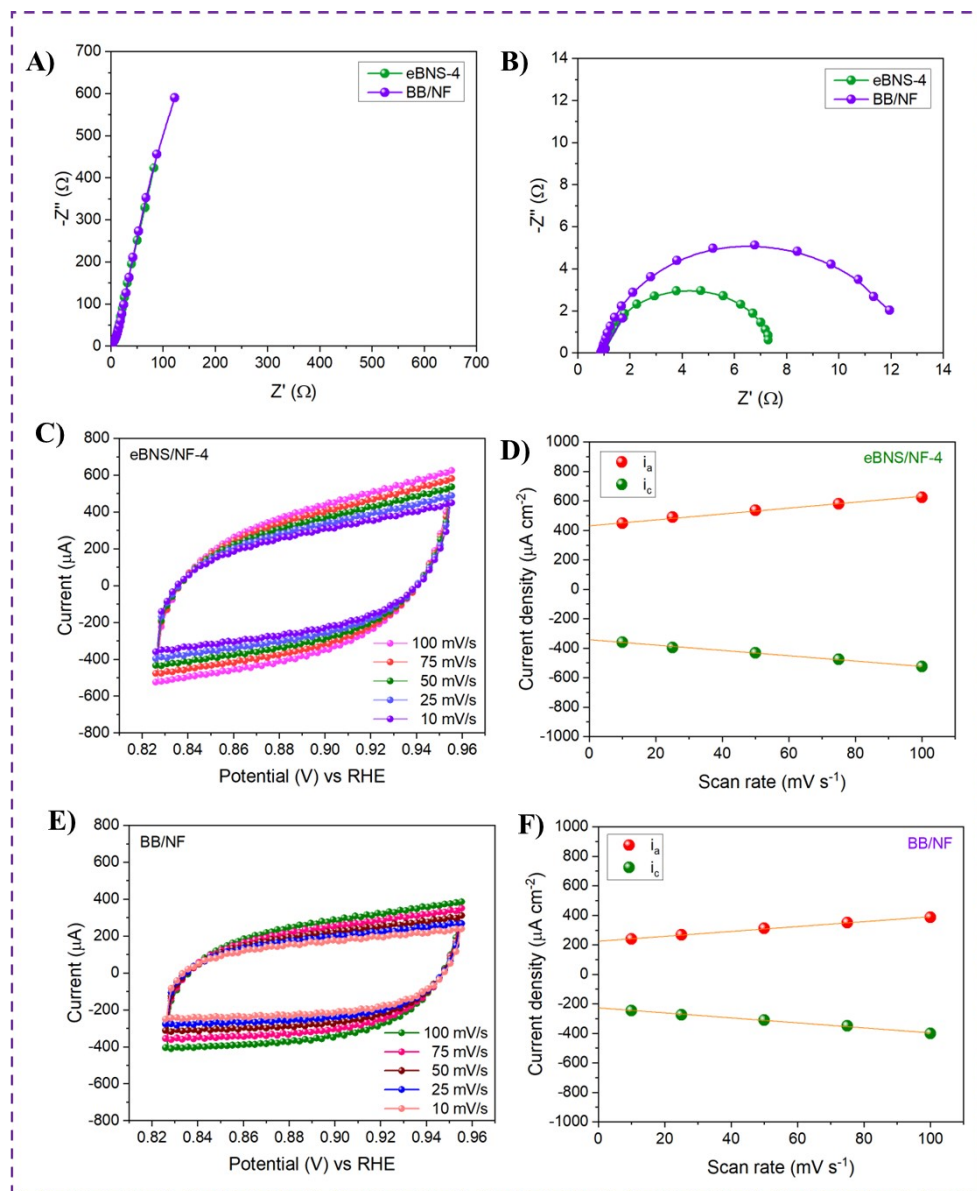

**Figure S15:** Electrode kinetics of eBNS/NF-4 and BB/NF. (A) EIS spectrum of eBNS/NF-4 and BB/NF electrodes measured at a frequency range of 10000 Hz to 0.1 Hz in 1.0 M KOH at OCP. (B) Nyquist plot at an applied potential of 1.5 V vs. RHE. (C and E) CV profiles of an eBNS/NF-4 and BB/NF. (D and F) Corresponding capacitive currents rates with a scan rate of 10, 25, 50, 75 and 100  $\text{mV s}^{-1}$  in 1.0 M KOH.

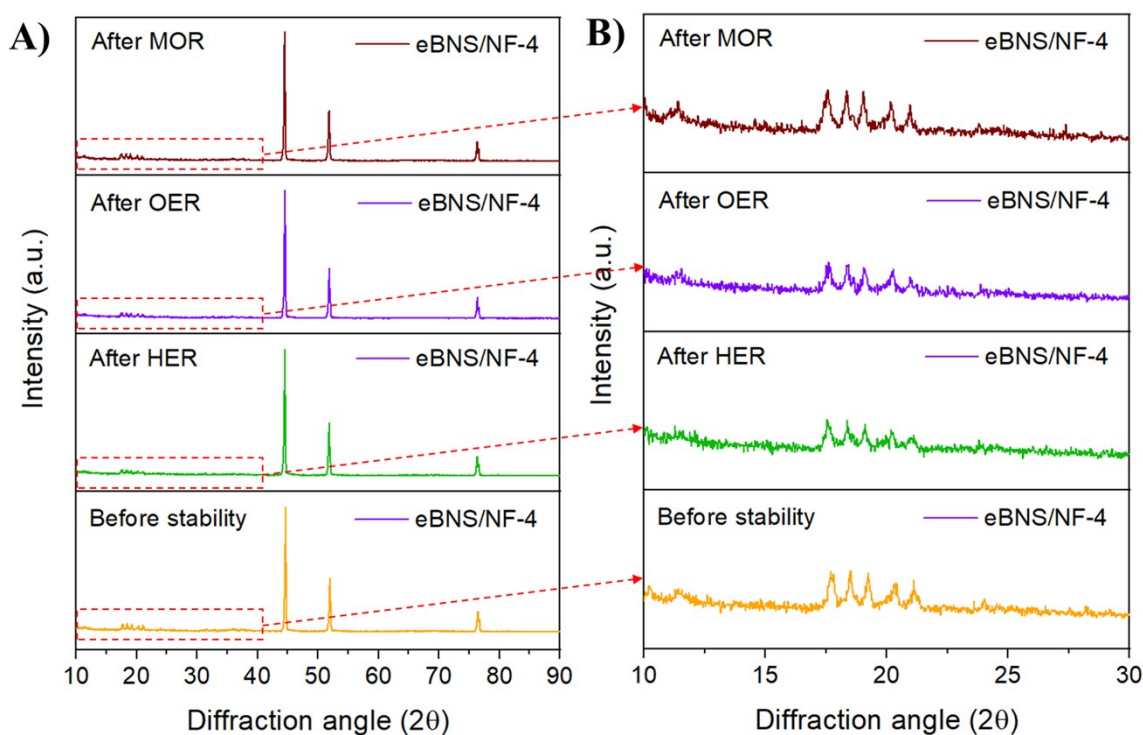

**Figure S16.** XRD analysis of eBNS-4 electrode fabricated on Nickel foam. (A) Comparative XRD pattern of as prepared electrode and after electrochemical reaction (HER, OER and MOR) (B) Zoomed version of the Figure A confirms the major peaks preserved after the stability test.

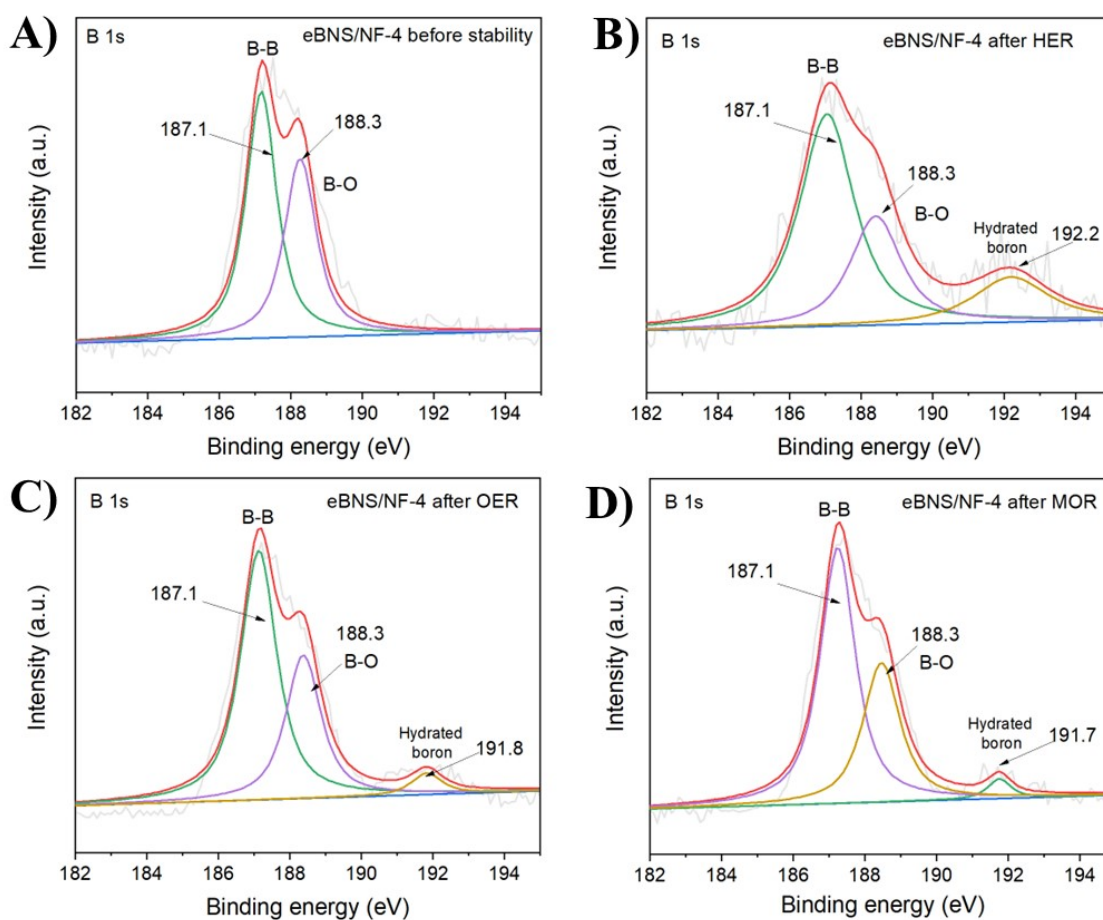

**Figure S17.** XPS analysis of eBNS/NF-4 before and after stability test. (A) B 1s spectrum before and after stability and (B-D) B 1s core-level spectrum after HER, OER and MOR.

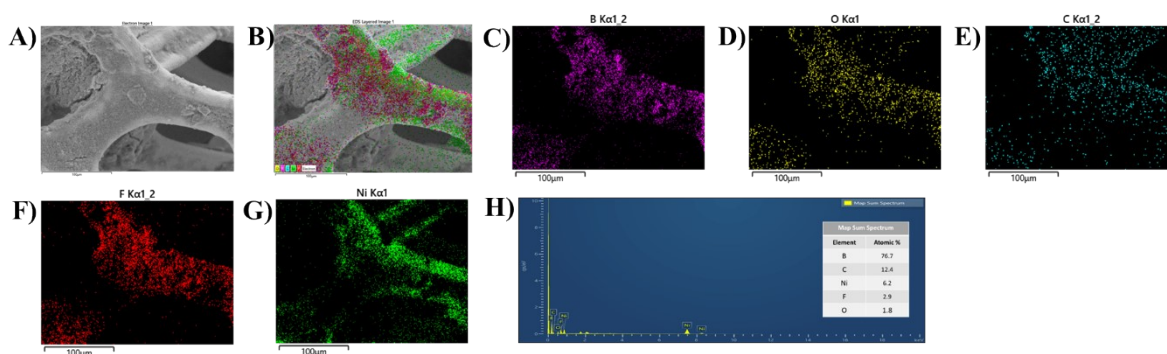

**Figure S18.** Morphological and elemental analysis of eBNS-4 electrode fabricated on Nickel foam. (A) FE-SEM micrographs of eBNS/NF-4 recorded under 100  $\mu\text{m}$  magnification. (B) Overlay map, (C-G) Elemental maps of (C) boron, (D) oxygen, (E) carbon, (F) fluorine, (G) nickel. (H) Presents the EDX spectrum of the eBNS/NF-4 electrode.

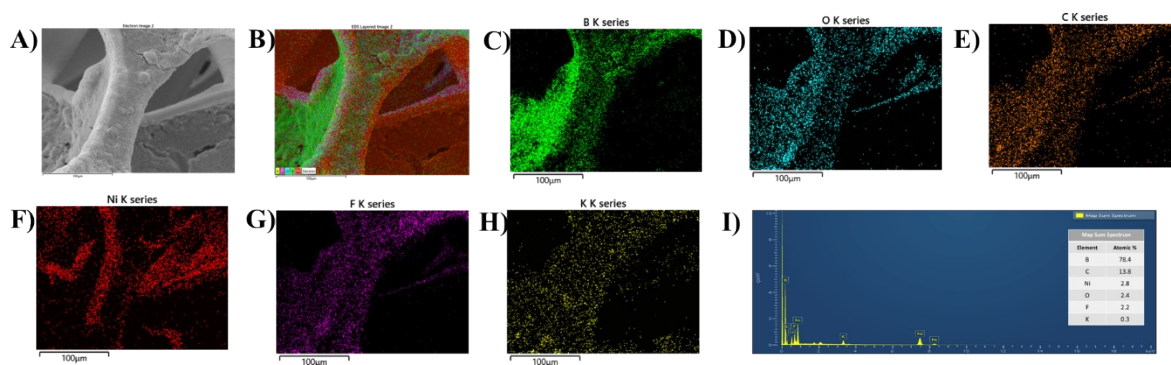

**Figure S19.** Morphological and elemental analysis of eBNS-4 electrode fabricated on Nickel foam after the HER stability test. (A) FE-SEM micrographs of eBNS/NF-4 recorded under 100  $\mu\text{m}$  magnification. (B) Overlay map, (C-H) Elemental maps of (C) boron, (D) oxygen, (E) carbon, (F) nickel, (G) fluorine and (H) potassium. (I) Presents the EDX spectrum of the eBNS/NF-4 electrode.

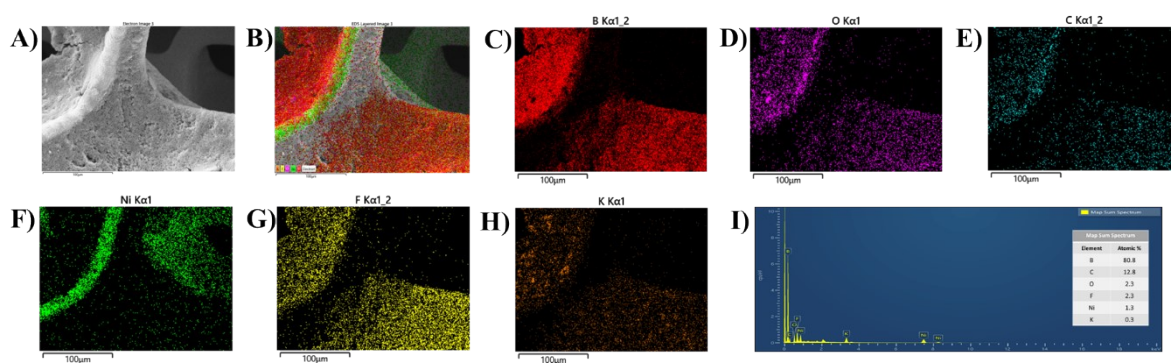

**Figure S20.** Morphological and elemental analysis of eBNS-4 electrode fabricated on Nickel foam after the OER stability test. (A) FE-SEM micrographs of eBNS/NF-4 recorded under 100  $\mu\text{m}$  magnification. (B) Overlay map, (C-H) Elemental maps of (C) boron, (D) oxygen, (E)

carbon, (F) nickel, (G) fluorine and (H) potassium. (I) Presents the EDX spectrum of the eBNS/NF-4 electrode.

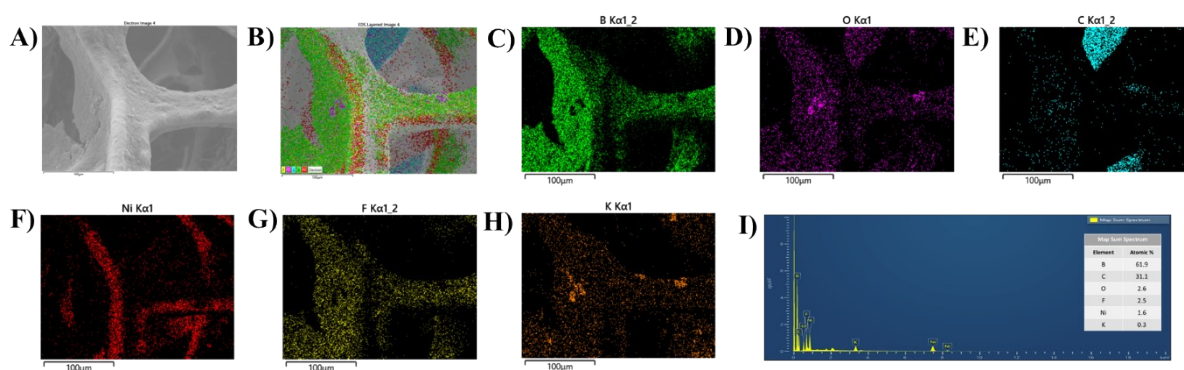

**Figure S21.** Morphological and elemental analysis of eBNS-4 electrode fabricated on Nickel foam after the MOR stability test. (A) FE-SEM micrographs of eBNS/NF-4 recorded under 100  $\mu\text{m}$  magnification. (B) Overlay map, (C-H) Elemental maps of (C) boron, (D) oxygen, (E)

carbon, (F) nickel, (G) fluorine and (H) potassium. (I) Presents the EDX spectrum of the eBNS/NF-4 electrode.

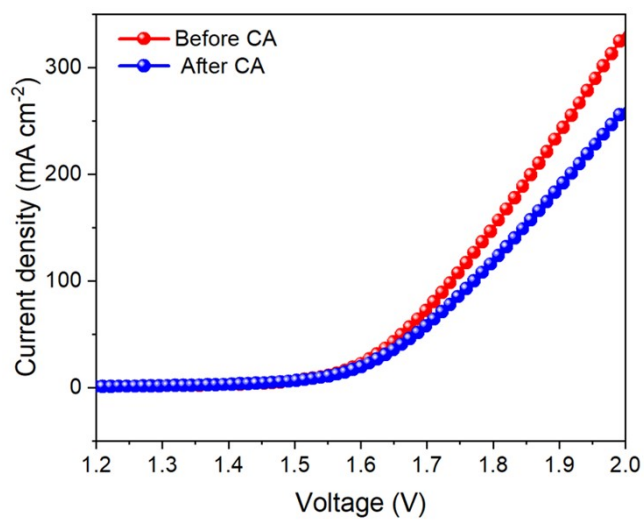

**Figure S22.** LSV polarization of hybrid electrolyser before and after durability test.

**Table S1.** Over all comparison analysis of eBNS/NF-4 with the recently reported catalysts

| Electrocatalysts     | Analysis               | Overpotential ( $\eta$ ) (mV cm <sup>-2</sup> ) | Tafel slope (mV dec <sup>-1</sup> ) | Electrolyte                        | Ref.      |
|----------------------|------------------------|-------------------------------------------------|-------------------------------------|------------------------------------|-----------|
| eBNS/NF-4            | HER                    | 146                                             | 68                                  | 1 M KOH and 1 M CH <sub>3</sub> OH | This work |
|                      | OER                    | 291                                             | 40                                  |                                    |           |
|                      | MOR                    | 190                                             | 52                                  |                                    |           |
|                      | Water splitting        | 1.71 V                                          | -                                   |                                    |           |
|                      | Hybrid water splitting | 1.57 V                                          | -                                   |                                    |           |
| CoP <sub>x</sub> @NC | HER                    | 187                                             | 58.5                                | 1 M KOH                            | 4         |
|                      | OER                    | 380                                             | 68.1                                |                                    |           |
|                      | Water splitting        | 1.71 V                                          | -                                   |                                    |           |
| Co/CoP-HNC           | HER                    | 180                                             | 105.6                               | 1 M KOH                            | 5         |
|                      | OER                    | 300                                             | 44.2                                |                                    |           |
|                      | Water splitting        | 1.68 V                                          | -                                   |                                    |           |
| Mo-CoP               | HER                    | 118                                             | 69                                  | 1 M KOH                            | 6         |
|                      | OER                    | 317                                             | 82                                  |                                    |           |
|                      | Water splitting        | 1.7 V                                           | -                                   |                                    |           |



|                                                                         |                 |         |       |         |    |
|-------------------------------------------------------------------------|-----------------|---------|-------|---------|----|
| h-CoP@NC                                                                | HER             | 196     | 84.5  | 1 M KOH | 7  |
|                                                                         | OER             | 339     | 95.1  |         |    |
|                                                                         | Water splitting | 1.764 V | -     |         |    |
| Co <sub>2</sub> P/Mo <sub>2</sub> C/Mo <sub>3</sub> Co <sub>3</sub> C@C | HER             | 182     | 65    | 1 M KOH | 8  |
|                                                                         | OER             | 362     | 82    |         |    |
|                                                                         | Water splitting | 1.74 V  | -     |         |    |
| NC/Co/CoP/CP                                                            | HER             | 208     | 126   | 1 M KOH | 9  |
|                                                                         | OER             | 350     | 133   |         |    |
|                                                                         | Water splitting | 1.72 V  | 10    |         |    |
| Co/CeO <sub>2</sub> /Co <sub>2</sub> P/CoP@NC                           | HER             | 195     | 66    | 1 M KOH | 10 |
|                                                                         | OER             | 307     | 99.6  |         |    |
|                                                                         | Water splitting | 1.76 V  | -     |         |    |
| CoP@NC/NCNT                                                             | HER             | 177     | 79    | 1 M KOH | 11 |
|                                                                         | OER             | 324     | 52    |         |    |
|                                                                         | Water splitting | 1.72 V  | -     |         |    |
| CoP@FeCoP/NCYSMPs                                                       | HER             | 141     | 56.34 | 1 M KOH | 12 |
|                                                                         | OER             | 238     | 47.98 |         |    |
|                                                                         | Water splitting | 1.68 V  | -     |         |    |

**Table S2.** Mass activity of eBNS/NF-4 and BB/NF for HER.

| Overpotential (mV) | Mass activity (HER) (A/g) |                   |
|--------------------|---------------------------|-------------------|
|                    | Bulk boron                | Few layered boron |
| @150               | -0.8                      | -2.474            |
| @200               | -0.922                    | -11.622           |
| @250               | -1.902                    | -29.09            |
| @300               | -8.6                      | -57.824           |

**Calculation for Active sites confirmation**

Total no of B (active sites) =  $1.1141 \times 10^{23}$

**Turn over frequency calculation**

TOF = Current density  $\times$  Electrode area  $\times 6.023 \times 10^{23}(\text{H}_2/\text{s})/2(n) \times F(\text{faraday constant}) \times \text{Active sites}$

n = 2 for HER and 4 for OER.

**Table S3.** TOF calculated for the prepared catalysts for HER

| <b>Overpotential<br/>(mV)</b> | <b>TOF (HER)<br/>(H<sub>2</sub>/s)</b> |                              |
|-------------------------------|----------------------------------------|------------------------------|
|                               | <b>Bulk boron</b>                      | <b>Few layered<br/>boron</b> |
| <b>@150</b>                   | 1.12E <sup>-4</sup>                    | 3.46E <sup>-4</sup>          |
| <b>@200</b>                   | 1.29E <sup>-4</sup>                    | 0.0016                       |
| <b>@250</b>                   | 2E <sup>-4</sup>                       | 0.004                        |
| <b>@300</b>                   | 0.0012                                 | 0.008                        |

**Table S4.** Mass Activity of eBNS/NF-4 and BB/NF for OER.

| <b>Overpotential<br/>(mV)</b> | <b>Mass activity<br/>(A/g)</b> |                          |
|-------------------------------|--------------------------------|--------------------------|
|                               | <b>Bulk boron</b>              | <b>Few layered boron</b> |
| <b>@300</b>                   | 0.464                          | 2.946                    |
| <b>@350</b>                   | 0.918                          | 16.302                   |
| <b>@400</b>                   | 2.644                          | 41.4                     |
| <b>@450</b>                   | 7.282                          | 73.266                   |

**Table S5.** TOF calculated for the prepared catalysts for OER

| <b>Overpotential<br/>(mV)</b> | <b>TOF<br/>(O<sub>2</sub>/s)</b> |                              |
|-------------------------------|----------------------------------|------------------------------|
|                               | <b>Bulk boron</b>                | <b>Few layered<br/>boron</b> |
| <b>@300</b>                   | 3E <sup>-5</sup>                 | 2E <sup>-4</sup>             |
| <b>@350</b>                   | 6E <sup>-5</sup>                 | 1E <sup>-3</sup>             |
| <b>@400</b>                   | 1E <sup>-4</sup>                 | 0.002                        |
| <b>@450</b>                   | 5E <sup>-4</sup>                 | 0.005                        |

**Table S6.** Hybrid water electrolyser performance of eBNS/NF-4||eBNS/NF-4 device with the recently reported hybrid devices

| Electrocatalysts                                            | Analysis               | Electrolyte                        | Cell voltage at 10 mA cm <sup>-2</sup> | Ref. |
|-------------------------------------------------------------|------------------------|------------------------------------|----------------------------------------|------|
| Ni(OH) <sub>2</sub> /NF                                     | Hybrid water splitting | 1 M KOH + 0.5 M CH <sub>3</sub> OH | 1.52 V                                 | 13   |
| CoS <sub>x</sub> (OH) <sub>y</sub> /C<br>P                  | Hybrid water splitting | 1 M KOH + 3 M CH <sub>3</sub> OH   | 1.578 V                                | 14   |
| Ni <sub>0.33</sub> Co <sub>0.67</sub> (OH) <sub>2</sub> /NF | Hybrid water splitting | 1 M KOH + 0.5 M CH <sub>3</sub> OH | 1.50 V                                 | 15   |
| NC@CuCo <sub>2</sub> N <sub>x</sub> /CF                     | Hybrid water splitting | 1 M KOH + 0.015 M benzyl alcohol   | 1.55 V                                 | 16   |
| Ni <sub>2</sub> P/NF                                        | Hybrid water splitting | 1 M KOH + 0.01 M HMF               | 1.65 V                                 | 17   |

|                                   |                        |                                                |         |           |
|-----------------------------------|------------------------|------------------------------------------------|---------|-----------|
| Co-S-P/CC                         | Hybrid water splitting | 1 M KOH + 1 M C <sub>2</sub> H <sub>5</sub> OH | 1.63    | 18        |
| $\alpha$ -Co(OH) <sub>2</sub> /CP | Hybrid water splitting | 1 M KOH + 3 M CH <sub>3</sub> OH               | 1.758 V | 14        |
| eBNS/NF-4                         | Hybrid water splitting | 1 M KOH + 4 M CH <sub>3</sub> OH               | 1.55 V  | This work |

## References

- 1 Y. Zhu, W. Zhou, Y. Zhong, Y. Bu, X. Chen, Q. Zhong, M. Liu and Z. Shao, *Adv. Energy Mater.*, 2017, **7**, 1602122.
- 2 S. Wang, J. Nai, S. Yang and L. Guo, *ChemNanoMat*, 2015, **1**, 324–330.
- 3 S. Li, S. Sirisomboonchai, X. An, X. Ma, P. Li, L. Ling, X. Hao, A. Abudula and G. Guan, *Nanoscale*, 2020, **12**, 6810–6820.
- 4 J.-S. Li, L.-X. Kong, Z. Wu, S. Zhang, X.-Y. Yang, J.-Q. Sha and G.-D. Liu, *Carbon N. Y.*, 2019, **145**, 694–700.
- 5 Y. Hao, Y. Xu, W. Liu and X. Sun, *Mater. Horizons*, 2018, **5**, 108–115.
- 6 L. Li, Y. Guo, X. Wang, X. Liu and Y. Lu, *Langmuir*, 2021, **37**, 5986–5992.

- 7 X.-Z. Song, Y.-H. Zhao, W.-B. Yang, Y.-L. Meng, X. Chen, Z.-Y. Niu, X.-F. Wang and Z. Tan, *ACS Appl. Nano Mater.*, 2021, **4**, 13450–13458.
- 8 X. Li, X. Wang, J. Zhou, L. Han, C. Sun, Q. Wang and Z. Su, *J. Mater. Chem. A*, 2018, **6**, 5789–5796.
- 9 M. Cong, D. Sun, L. Zhang and X. Ding, *Chinese J. Catal.*, 2020, **41**, 242–248.
- 10 X.-Z. Song, Q.-F. Su, S.-J. Li, G.-C. Liu, N. Zhang, W.-Y. Zhu, Z.-H. Wang and Z. Tan, *Int. J. Hydrogen Energy*, 2020, **45**, 30559–30570.
- 11 Z. Wu, B. Liu, H. Jing, H. Gao, B. He, X. Xia, W. Lei and Q. Hao, *J. Colloid Interface Sci.*, 2023, **629**, 22–32.
- 12 J. Shi, F. Qiu, W. Yuan, M. Guo and Z.-H. Lu, *Chem. Eng. J.*, 2021, **403**, 126312.
- 13 J. Hao, J. Liu, D. Wu, M. Chen, Y. Liang, Q. Wang, L. Wang, X.-Z. Fu and J.-L. Luo, *Appl. Catal. B Environ.*, 2021, **281**, 119510.
- 14 K. Xiang, D. Wu, X. Deng, M. Li, S. Chen, P. Hao, X. Guo, J. Luo and X. Fu, *Adv. Funct. Mater.*, 2020, **30**, 1909610.
- 15 M. Li, X. Deng, K. Xiang, Y. Liang, B. Zhao, J. Hao, J. Luo and X. Fu, *ChemSusChem*, 2020, **13**, 914–921.
- 16 J. Zheng, X. Chen, X. Zhong, S. Li, T. Liu, G. Zhuang, X. Li, S. Deng, D. Mei and J.-G. Wang, *Adv. Funct. Mater.*, 2017, **27**, 1704169.
- 17 B. You, N. Jiang, X. Liu and Y. Sun, *Angew. Chemie Int. Ed.*, 2016, **55**, 9913–9917.
- 18 S. Sheng, K. Ye, L. Sha, K. Zhu, Y. Gao, J. Yan, G. Wang and D. Cao, *Inorg. Chem. Front.*, 2020, **7**, 4498–4506.
